# Supplementary material
Source: publisher figshare collection journal article supplement (https://acs.figshare.com/ndownloader/files/31715965)
Supplement: Supplementary file [file 31715965]

## Supporting Information

### Enhancement of antiviral effect of plastic film against SARS-CoV-2: Combining nanomaterials and nanopatterns with scalability for mass manufacturing

Yuyang Zhou<sup>1,5</sup>, Nicola F. Fletcher<sup>2,3</sup>, Nan Zhang<sup>1,\*</sup>, Jaythoon Hassan<sup>4</sup>, Michael D. Gilchrist<sup>1</sup>

<sup>1</sup> Centre of Micro/Nano Manufacturing Technology (MNMT-Dublin), School of Mechanical & Materials Engineering, University College Dublin, Dublin, D04 KW52, Ireland

<sup>2</sup> School of Veterinary Medicine, University College Dublin, Dublin, D04 KW52, Ireland

<sup>3</sup> Conway Institute of Biomolecular and Biomedical Science, University College Dublin, Dublin, D04 KW52, Ireland

<sup>4</sup> National Virus Reference Laboratory, University College Dublin, Dublin, D04 KW52, Ireland

<sup>5</sup> National Engineering Laboratory for Modern Silk, College of Textile and Clothing Engineering, Soochow University, Suzhou, 215123, China

*\* Corresponding author:*

nan.zhang@ucd.ie (N. Zhang)

| Content                     | Page      |
|-----------------------------|-----------|
| <i>6 figures in 3 pages</i> |           |
| <b>Fig. S1-S3</b>           | <i>S2</i> |
| <b>Fig. S4-S6</b>           | <i>S3</i> |

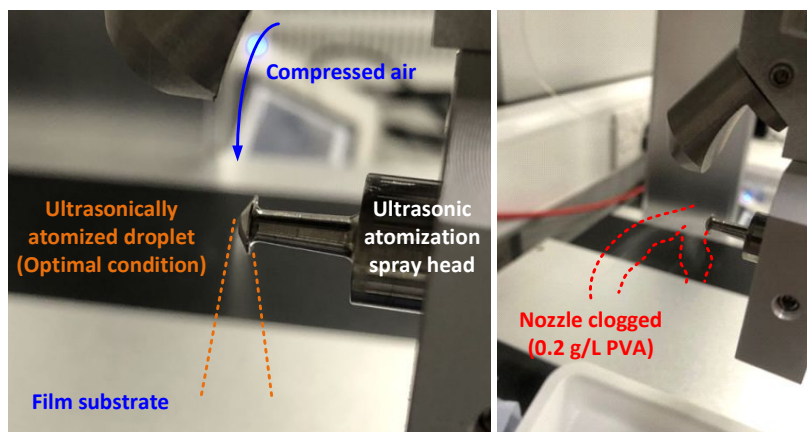

**Fig. S1** Photos for tiny droplets generated during UASC.

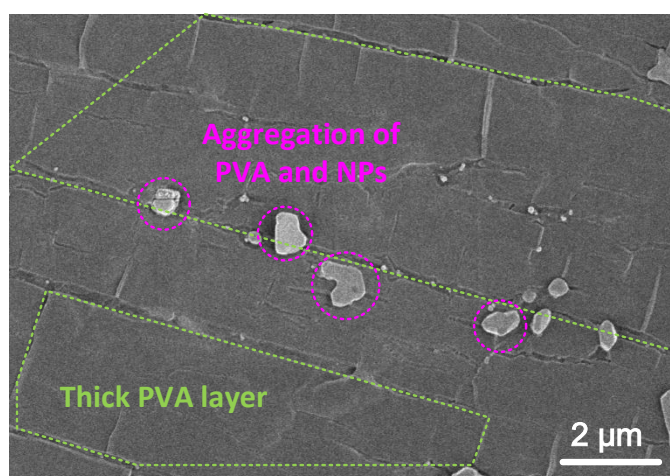

**Fig. S2** SEM image of PE film after UASC (300 ppm AgNPs, 0.2 g/L PVA, 2 g/L SDS, 10 passes).

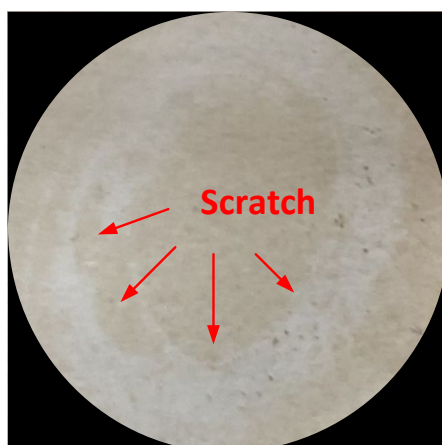

**Fig. S3** Photo of PE film after UASC (300 ppm AgNPs, 0.1 mg/L PVA, 2 g/L SDS, 20 passes) after wear test.

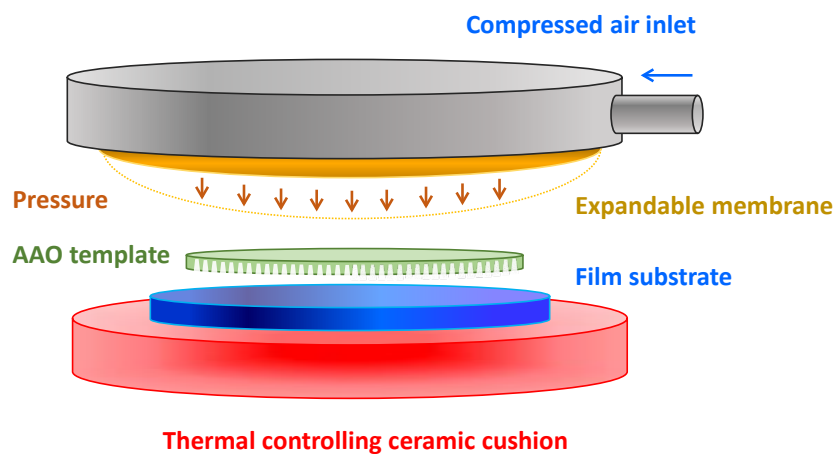

**Fig. S4** A scheme for TNIL equipment.

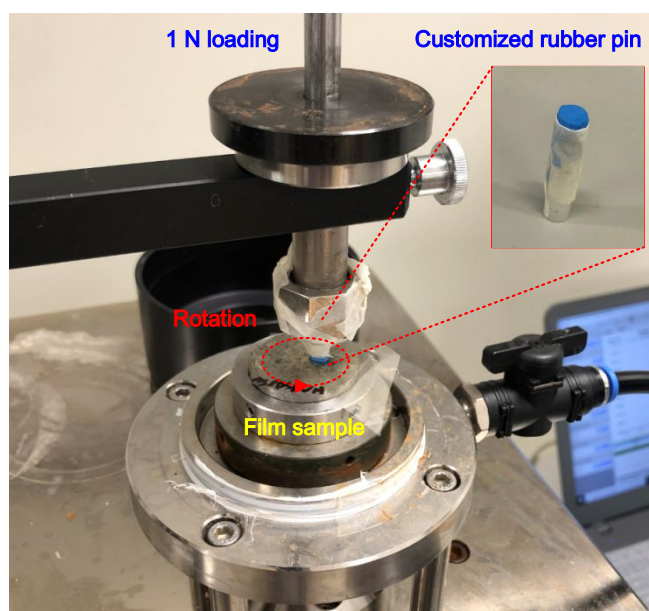

**Fig. S5** Wear test setup with a customized rubber pin.

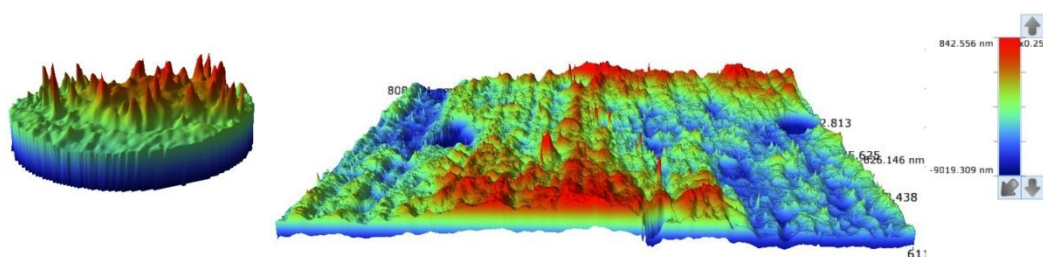

**Fig. S6** 3D morphology of nanopatterned film after wear test.
